# Supplementary material for: CircRNA Cdr1as functions as a competitive endogenous RNA to promote hepatocellular carcinoma progression
Source: publisher site journal article supplement (doi:10.18632/aging.102312), 2019-10-01
Supplement: Supplementary file [file aging-v11i19-102312-supplementary-material-SD1.pdf]

**SUPPLEMENTARY FIGURES**

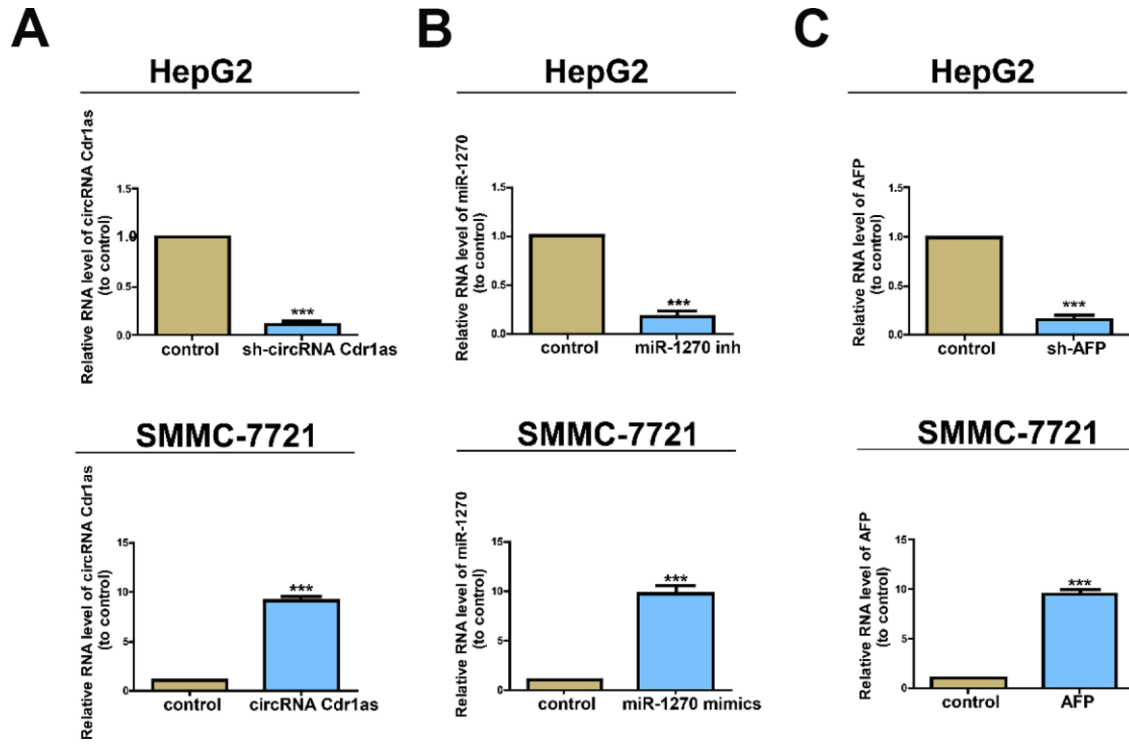

**Supplementary Figure 1.** (A) After transfection, the relative levels of circRNA Cdr1as were detected by qRT-PCR. (B) After transfection, the relative levels of miR-1270 were detected by qRT-PCR. (C) After transfection, the relative levels of AFP were detected by qRT-PCR. Results are presented as mean ± SD. \* $P < 0.05$ , \*\* $P < 0.01$ , \*\*\* $P < 0.001$ . All of the experiments were performed in triplicate.

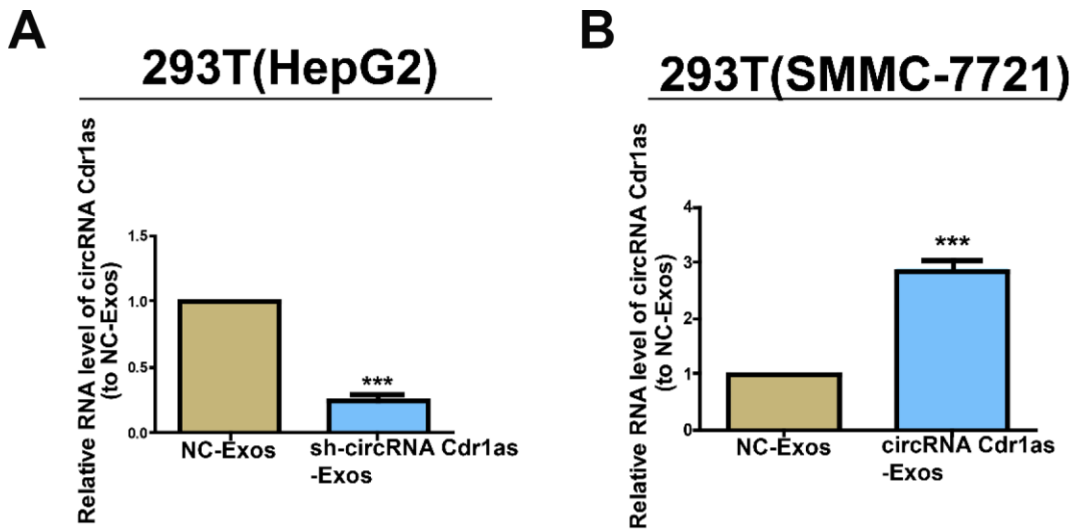

**Supplementary Figure 2.** (A) The levels of circRNA Cdr1as in HepG2, SMMC-7721 and 293T cells. (B) The levels of exosomal circRNA Cdr1as in HepG2, SMMC-7721 and 293T cells. Results are presented as mean ± SD. \* $P < 0.05$ , \*\* $P < 0.01$ , \*\*\* $P < 0.001$ . All of the experiments were performed in triplicate.

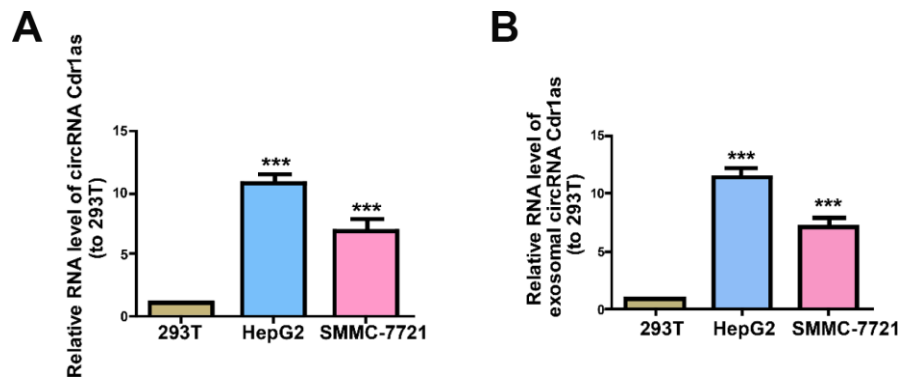

**Supplementary Figure 3.** (A) Comparing with control group, circRNA Cdr1as level in 293T cells was reduced by exposure of sh-circRNA Cdr1as-Exos. (B) Comparing with control group, circRNA Cdr1as level in 293T cells exposed to circRNA Cdr1as-Exos was elevated. Results are presented as mean  $\pm$  SD. \* $P$ <0.05, \*\* $P$ <0.01, \*\*\* $P$ <0.001. All of the experiments were performed in triplicate.
